# Supplementary material for: Production Induced In Situ Stress Change and Geomechanical Dilation to Boost the Production in an Offshore Oilsands Reservoir
Source: Research Square preprint supplement (doi:10.21203/rs.3.rs-8272412/v1), 2025-12-22
Supplement: Supplementary file 1 [file 7cf478b075c9ed64982449da.docx]

Dear Editor,

We are pleased to submit our manuscript entitled “*Production Induced In Situ Stress Change and Geomechanical Dilation to Boost the Production in an Offshore Oilsands Reservoir*” for consideration in **Geomechanics and Geophysics for Geo-Energy and Geo-Resources**. This work presents the first documented case of repeated minifrac measurements acquired before and after thermal stimulation in an offshore heavy-oil reservoir, providing direct field evidence of production-induced stress evolution. By integrating laboratory triaxial testing, minifrac-derived stress constraints, and an iteratively coupled CMG-STARS–ABAQUS thermo–hydro–mechanical model, we simulate geomechanical dilation, and design a geomechanical dilation treatment that substantially improved steam injectivity and oil production.

The study contributes several novel insights of interest to the journal’s readership:

1. Direct measurement of stress evolution in a mature offshore oilsands reservoir, showing a ~3.8 MPa reduction in Shmin after thermal cycling—a rare dataset for validating reservoir geomechanics.
2. Demonstration of a stress-informed geomechanical dilation treatment, implemented between CSS cycles, which successfully reduced injection pressure and boosted oil rates.
3. A validated coupled THM workflow linking thermal flow, pore-pressure changes, deformation, and permeability enhancement, offering a template for safe and effective dilation design in unconsolidated reservoirs.
4. Broader implications for thermal recovery, CCS, and UGS operations, where stress-path evolution governs fault stability and stimulation outcomes.

We confirm that this manuscript is original, has not been published previously, and is not under consideration elsewhere. All authors have approved the manuscript and consent to its submission. There are no conflicts of interest to declare.

Given the manuscript’s relevance to in-situ stress characterization, THM coupling, dilation mechanisms, and offshore reservoir geomechanics, we believe it aligns well with the scope of **Geomechanics and Geophysics for Geo-Energy and Geo-Resources**. We hope you will find the manuscript suitable for peer review.

Thank you for your consideration. We look forward to your response.

Sincerely,

*Yunchuan Fu
CNOOC Key Laboratory of Offshore Heavy Oil Thermal Recovery
Email: fuych8@cnooc.com.cn*

*Dr. Bin Xu
Origin Geomechanics Inc., Calgary, Canada
Email: binxu@origingeomechanics.com*

*(On behalf of all co-authors)*
